# Supplementary material for: Dietary total antioxidant capacity and odds of lung cancer: a large case-control study
Source: Springer Nature journal article supplement (doi:10.1186/s12885-024-12914-2), 2024-09-27
Supplement: MOESM1 [file 12885_2024_12914_MOESM1_ESM.docx]

| Supplementary Table 1. Risk of lung cancer among smokers and non-smokers in relation to dTAC1 | | | | | | | | | |
| --- | --- | --- | --- | --- | --- | --- | --- | --- | --- |
|  |  | Non-smokers2 | | smokers | | | | | |
|  |  | Cases/control | OR (95%CI) | | Cases/control | | | OR (95%CI) | P for interaction | |
| FRAP3 | First tertile | 134/718 | Reference | | | | 194/350 | 0.53(0.39-0.71) | 0.07 | |
| Second tertile | 87/761 | 1.43(1.03-1.99) | | | 143/290 | | 1.09(0.76-1.57) |
| Third tertile | 75/713 | 0.41(0.29-0.57) | | | 157/321 | | 0.95(0.67-1.35) |
| TRAP4 | First tertile | 109/705 | Reference | | | 239/341 | | 2.13(1.51-3.03) | 0.25 | |
| Second tertile | 91/726 | 0.61(0.45-0.85) | | | 122/322 | | 0.91(0.62-1.33) |
| Third tertile | 96/761 | 0.56(0.40-0.77) | | | 133/298 | | 0.99(0.68-1.45) |
| 1Adjusted for energy (continues, Kcal/d), age (five categories), sex (female, male), provinces(nine provinces of Iran), SES (low, medium, high), opium use (never user, user), water pipe use (no, yes), regular alcohol use (no, yes), workload physical activity (sedentary, moderate, heavy) and BMI (continues, kg/m2)  2nonsmokers don’t use any of cigarette, water pipes or opium  2FRAP: Ferric Reducing **Antioxidant** Power **of Diet**  3TRAP: Total Radical-trapping **Antioxidant** Parameters of the diet | | | | | | | | | |

| Supplementary Table 2. Risk of lung cancer among opium users and non-users in relation to dTAC1 | | | | | | | |  | | |
| --- | --- | --- | --- | --- | --- | --- | --- | --- | --- | --- |
|  |  | non-users2 | | | opium users | | |  | | |
|  |  | Cases/control | OR (95%CI) | Cases/control | | | OR (95%CI) | | | P for interaction | |
| FRAP2 | First tertile | 134/718 | Reference | 166/162 | | 3.13(1.97-4.99) | | | 0.23 | | |
| Second tertile | 87/761 | 0.49(0.36-0.67) | 120/163 | | 1.88(1.17-3.02) | | |
| Third tertile | 75/713 | 0.37(0.27-0.52) | 116/130 | | 1.79(1.09-2.94) | | |
| TRAP3 | First tertile | 109/705 | Reference | 211/201 | | 4.53(2.86-7.19) | | | 0.21 | | |
| Second tertile | 91/726 | 0.59(0.43-0.83) | 93/151 | | 1.77(1.08-2.89) | | |
| Third tertile | 96/761 | 0.54(0.39-0.75) | 98/103 | | 2.09(1.25-3.52) | | |
| 1Adjusted for energy (continues, Kcal/d), age (continues, years), sex (female, male), provinces (nine provinces of Iran), SES (low, medium, high), cigarette smoking (no, yes), water pipe use (no, yes), regular alcohol use (no, yes), workload physical activity (sedentary, moderate, heavy) and BMI (continues, kg/m2)  2nonusers don’t use any of cigarette, water pipes, or opium  2FRAP: Ferric Reducing **Antioxidant** Power **of Diet**  3TRAP: Total Radical-trapping **Antioxidant** Parameters of the diet | | | | | | | | | | |

| Supplementary Table 3. Risk of lung cancer among water pipe users and non-users in relation to dTAC1 | | | | | | | | |  | | |
| --- | --- | --- | --- | --- | --- | --- | --- | --- | --- | --- | --- |
|  |  | non-users | | water pipe users | | | | |  | | |
|  |  | Cases/control | OR (95%CI) | | Cases/control | | | OR (95%CI) | | P for interaction | | |
| FRAP2 | First tertile | 134/718 | Reference | | | 20/47 | 1.31(0.69-2.48) | | | | 0.41 | |
| Second tertile | 87/761 | 0.55(0.39-0.74) | | 27/61 | | 1.11(0.61-2.02) | | | |
| Third tertile | 75/713 | 0.47 (0.33-0.67) | | 33/116 | | 0.61(0.34-1.09) | | | |
| TRAP3 | First tertile | 109/705 | Reference | | | 22/62 | 1.35(0.73-2.49) | | | | 0.81 | |
| Second tertile | 91/726 | 0.62(0.45-0.86) | | | 29/70 | 1.06(0.59-1.92) | | | |
| Third tertile | 96/761 | 0.55(0.39-0.76) | | | 29/92 | 0.79(0.44-1.43) | | | |
| 1Adjusted for energy (continues, Kcal/d), age (continues, years), sex (female, male), provinces (nine provinces of Iran), SES (low, medium, high), opium use (never user, user), cigarette smoking (no, yes), regular alcohol use (no, yes), workload physical activity (sedentary, moderate, heavy) and BMI (continues, kg/m2)  2nonusers don’t use any of cigarette, water pipes or opium  2FRAP: Ferric Reducing **Antioxidant** Power **of Diet**  3TRAP: Total Radical-trapping **Antioxidant** Parameters of the diet | | | | | | | | | | | |
